# Supplementary material
Source: MDPI journal article supplement (https://www.mdpi.com/2073-4352/13/3/502)
Supplement: s1 [file s1]

Computer simulations of a twist bend nematic ( $N_{TB}$ ): a coarse-grained simulation of the phase behaviour of the liquid crystal dimer CB7CB.

Electronic Supplementary Information.

Mark R. Wilson <sup>1</sup>, Gary Yu <sup>1</sup>

<sup>1</sup> Department of Chemistry, Durham University,  
Science Laboratories, Stockton Road,  
Lower Mountjoy, Durham DH1 3LE, UK

Correspondence: mark.wilson@durham.ac.uk

March 13, 2023

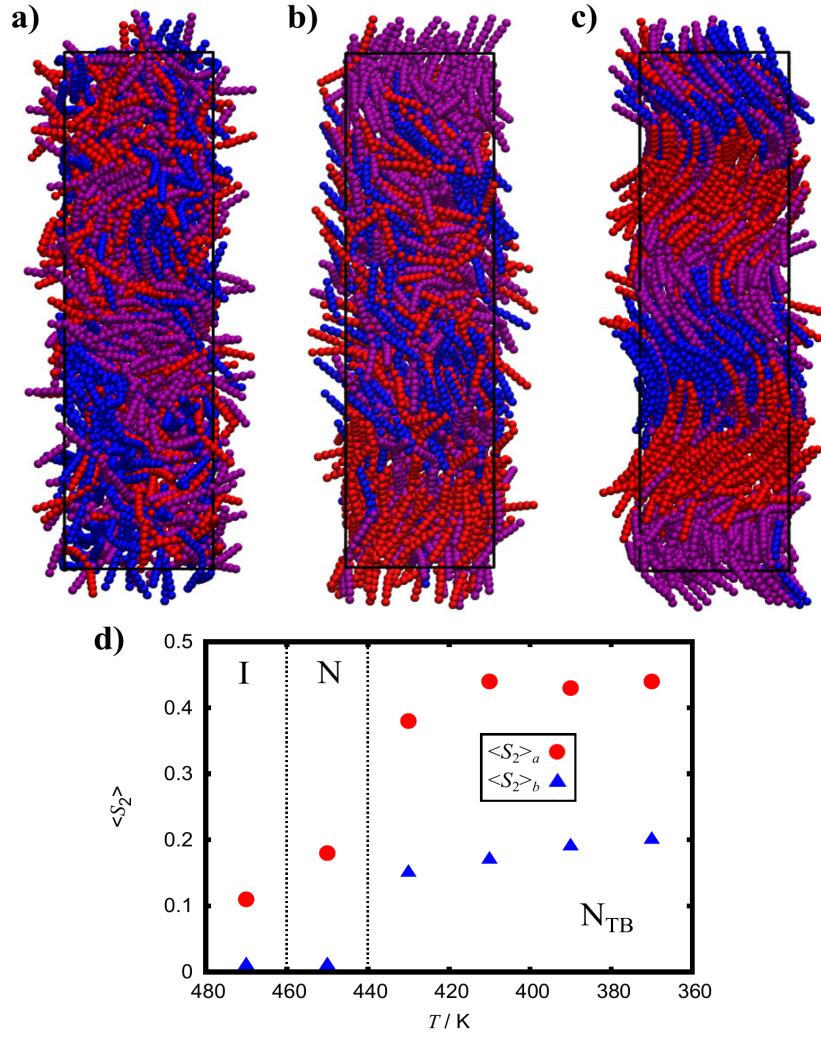

Figure S1: Simulation snapshots for 512 molecules of the FM CG model, obtained via cooling from an isotropic liquid. Results show: (a) the initial I phase at 470 K, (b) the N phase at 450 K, (c) the N<sub>TB</sub> phase at 370 K, (d) the average orientational order parameter,  $\langle S_2 \rangle$ , for unit vectors  $\hat{\mathbf{a}}$  and  $\hat{\mathbf{b}}$  obtained from a cooling run starting in the I phase between the temperatures 470–370 K.

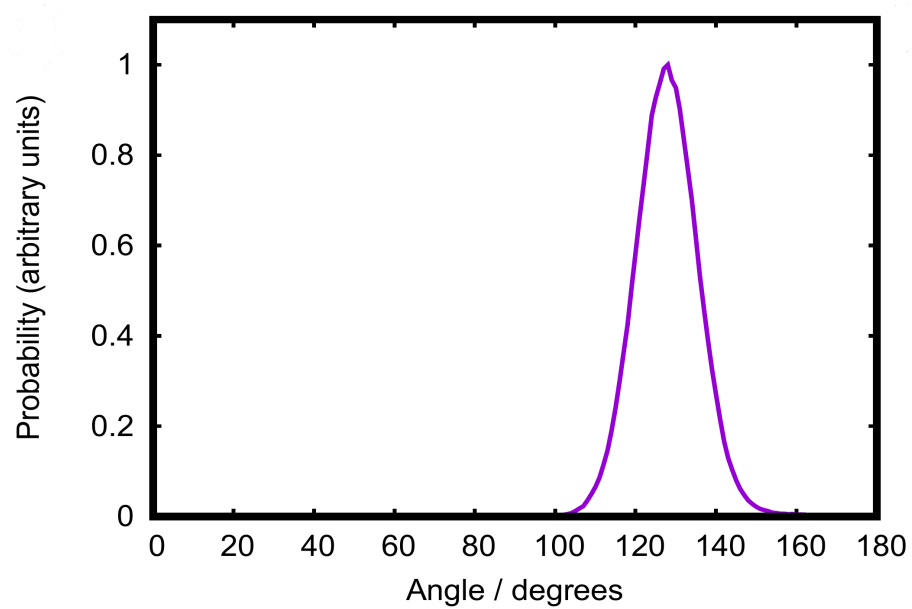

Figure S2: Bend angle distribution function calculated from the angle between rigid mesogenic units. Simulations taken from the bulk phase simulation of the FM CG model at 370 K.
